# Supplementary material for: Daidzein ameliorated concanavalin A-induced liver injury through the Akt/GSK-3β/Nrf2 pathway in mice
Source: PubMed Central journal article supplement — Ann Transl Med. 2021 Aug;9(15):1228. doi: 10.21037/atm-21-378 (PMC8421986; doi:10.21037/atm-21-378), 2021-08
Supplement: atm-09-15-1228-dss.pdf [file atm-09-15-1228-dss.pdf]

## Data Sharing Statement

|                     |                                                                                                                                                     |                                                                                                                                                                                                                                          |
|---------------------|-----------------------------------------------------------------------------------------------------------------------------------------------------|------------------------------------------------------------------------------------------------------------------------------------------------------------------------------------------------------------------------------------------|
| <b>Article Info</b> | <a href="https://dx.doi.org/10.21037/atm-21-378">https://dx.doi.org/10.21037/atm-21-378</a>                                                         |                                                                                                                                                                                                                                          |
| <b>Item</b>         | <b>Question</b>                                                                                                                                     | <b>Authors' Response<br/>(place "-" if not applicable)</b>                                                                                                                                                                               |
| 1                   | Would you like to share data collected for your study to others?                                                                                    | Y                                                                                                                                                                                                                                        |
| 2                   | If not, would you like to share the reason for your decision?                                                                                       | -                                                                                                                                                                                                                                        |
| 3                   | What data in particular will be shared?                                                                                                             | The protective effects of daidzein in Con A-induced liver injury and AML-12 apoptosis, we have demonstrated that daidzein reduced the Con A-induced oxidative stress response and hepatocyte apoptosis, which had not been shown before. |
| 4                   | Any other documents will be shared? Such as study protocol, statistical analysis plan, informed consent form, clinical study report, analytic code. | Study protocol, statistical analysis plan will also be shared if requested.                                                                                                                                                              |
| 5                   | When will data availability begin?                                                                                                                  | From the publication date.                                                                                                                                                                                                               |
| 6                   | When will data availability end?                                                                                                                    | Two years within the publication date.                                                                                                                                                                                                   |
| 7                   | To whom will you share the data?                                                                                                                    | Medical researcher and hepatic surgeons who are interested in studies of AIH.                                                                                                                                                            |
| 8                   | For what type of analysis or purpose?                                                                                                               | For analysis to evaluate the safety of daidzein in AIH patients.                                                                                                                                                                         |
| 9                   | How or where can the data/documents be obtained?                                                                                                    | Emails could be sent to the address below to obtain the shared data: 305868659@qq.com.                                                                                                                                                   |
| 10                  | Any other restrictions?                                                                                                                             | We may balance the potential benefits and risks for each request and then provide the data that could be shared.                                                                                                                         |
