# Supplementary material for: Daidzein ameliorated concanavalin A-induced liver injury through the Akt/GSK-3β/Nrf2 pathway in mice
Source: PubMed Central journal article supplement — Ann Transl Med. 2021 Aug;9(15):1228. doi: 10.21037/atm-21-378 (PMC8421986; doi:10.21037/atm-21-378), 2021-08
Supplement: atm-09-15-1228-supplementary.pdf [file atm-09-15-1228-supplementary.pdf]

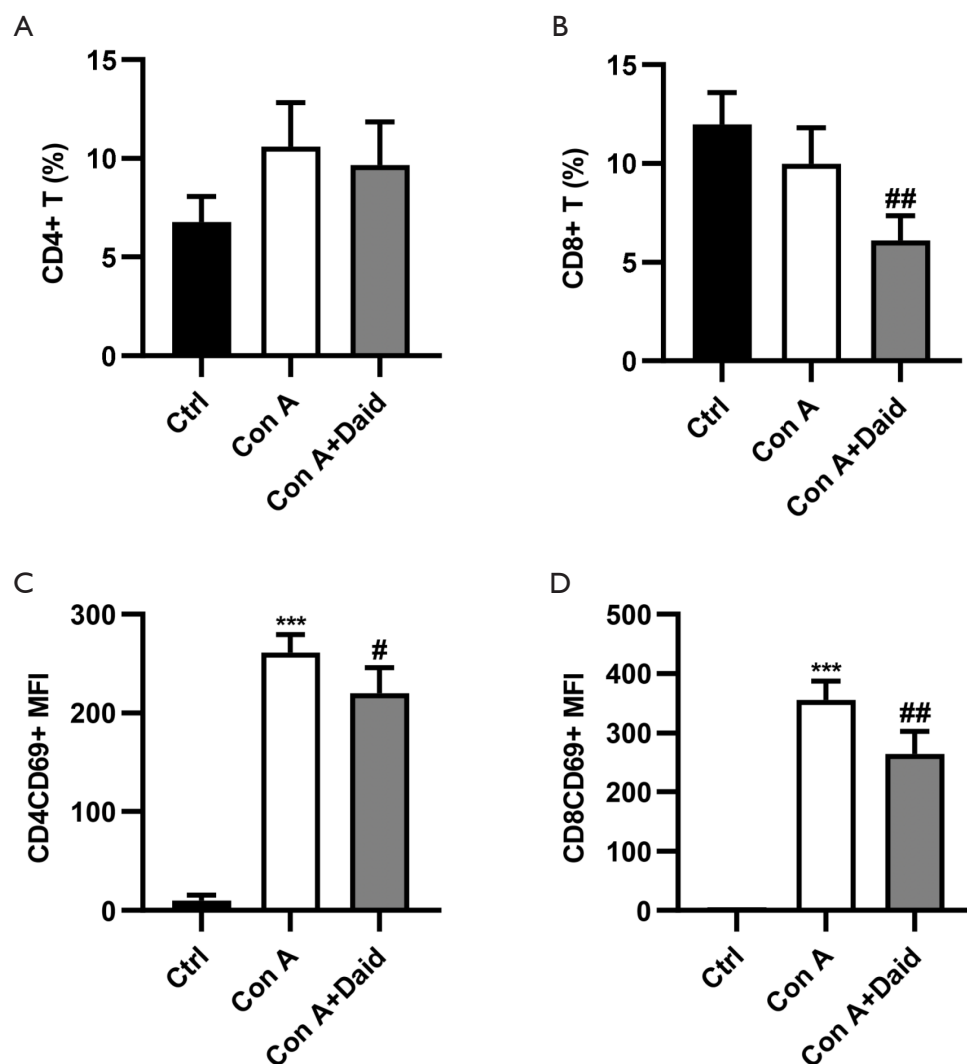

**Figure S1** Effect of daidzein on T cell activation in Con A-induced hepatitis. Liver tissues were harvested 12 h after Con A injection, and liver MNCs were collected. The cells were stained with antibodies against CD3, CD4, CD8 and CD69 and then analyzed by flow cytometry. (A,B) The proportions of CD4+ and CD8+ T cells in the CD3+ subset in the liver. (C,D) The mean fluorescence intensity (MFI) of CD4+CD69+ and CD8+CD69+ on every subset of the NC, Con A-treated, and Con A + Daid-treated groups. All the results were obtained from at least three independent experiments. Data are shown as the mean  $\pm$  SD (n=6 per group). \*\*\*P<0.001 *vs.* the Control group. #P<0.05 and ##P<0.01 *vs.* the Con A group. SD, standard deviation.

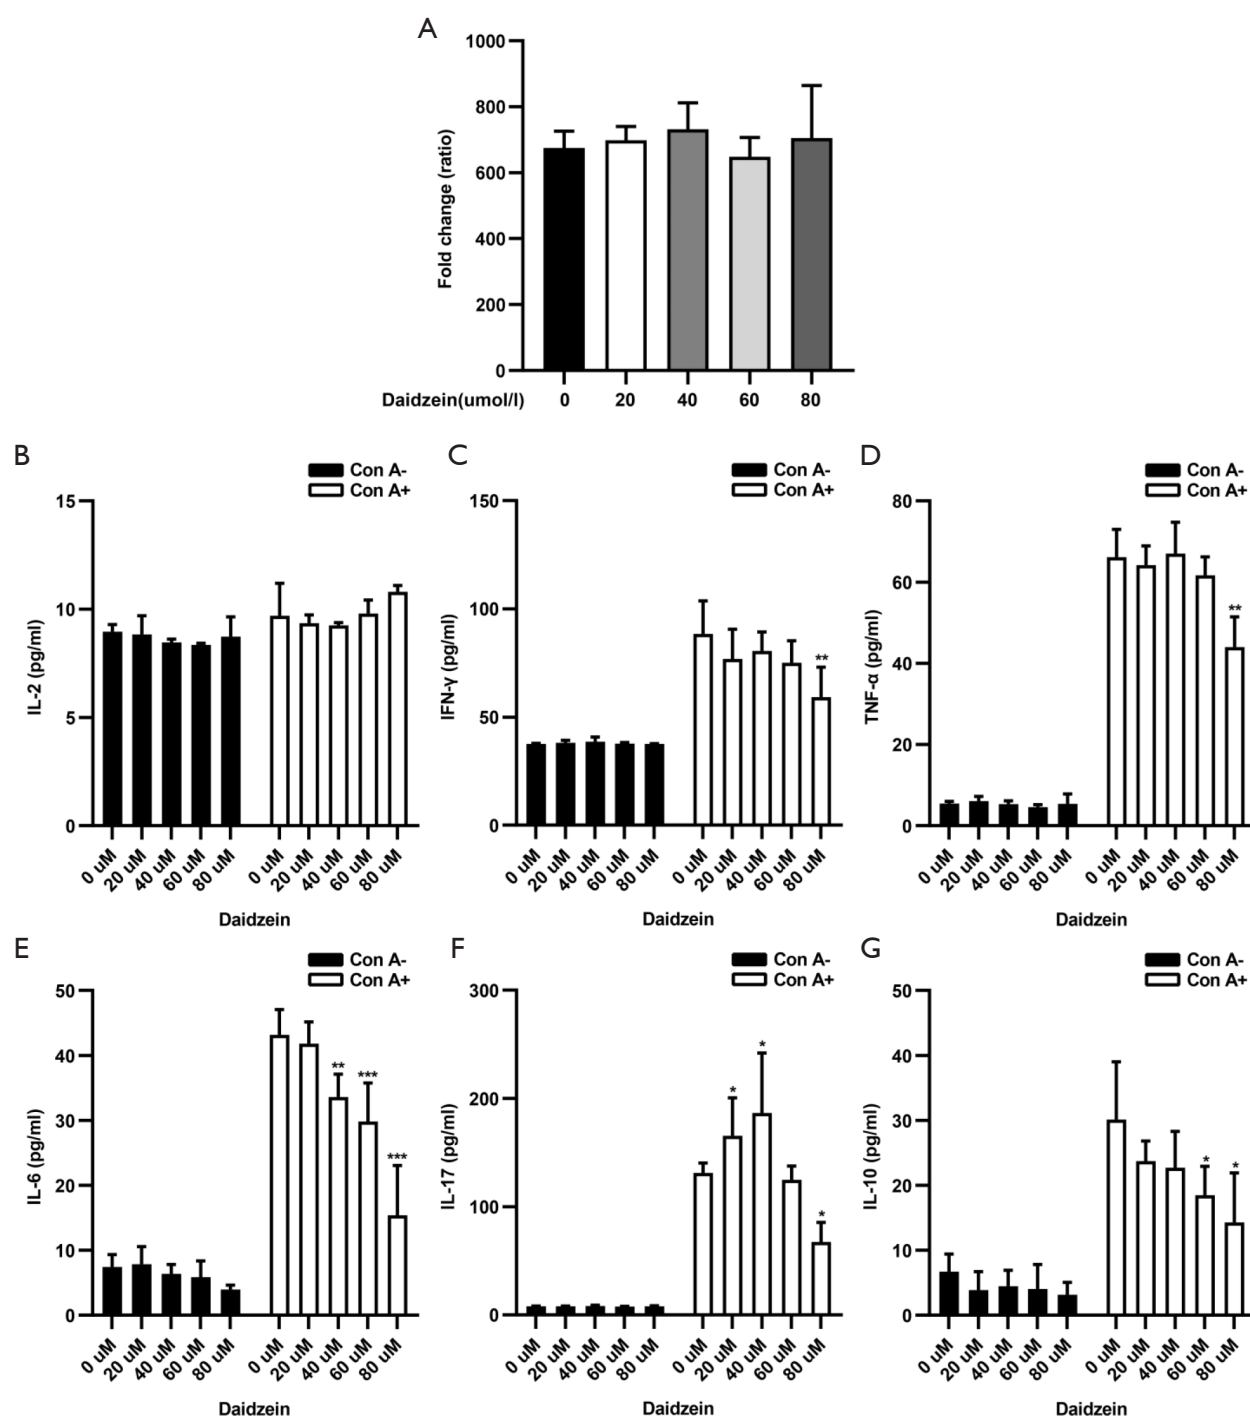

**Figure S2** Effect of daidzein on the proliferation and inflammatory cytokine secretion of Con A-stimulated splenocytes. Splenocytes from B6 mice were stimulated with 2 μg/mL Con A in the presence or absence of different concentrations of daidzein. After 72 h of culture, splenocyte proliferation was determined by a CFSE dilution assay. Cytokine concentrations in culture supernatants were quantified by CBA kits. (A) The proliferation of splenocytes was assessed by a CFSE dilution assay. (B-G) The levels of IL-2 (B), IFN-γ (C), TNF-α (D), IL-6 (E), IL-17 (F), and IL-10 (G) in culture supernatants. All the results were obtained from at least three independent experiments. Values are shown as the mean ± SD (n=6 per group). \*P<0.05, \*\*P<0.01, and \*\*\*P<0.001 vs. Con A+/0 μM group. CFSE, carboxy-fluorescein diacetate succinimidyl ester; CBA, cytometric bead array; SD, standard deviation.
